# Supplementary material for: Comparative analysis of the Oenococcus oeni pan genome reveals genetic diversity in industrially-relevant pathways
Source: PubMed Central journal article supplement (PMC3472311; doi:10.1186/1471-2164-13-373), 2012-08-03

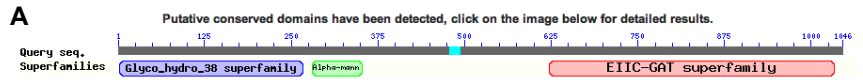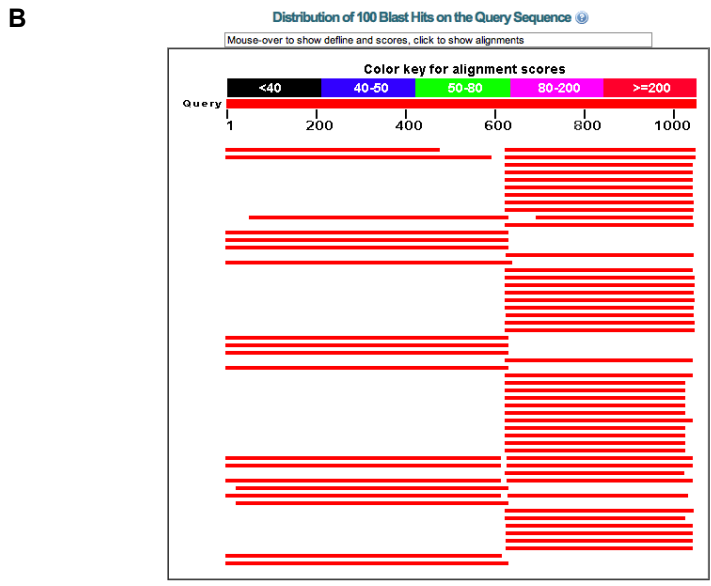

Supplement: 1471-2164-13-373-S7.pdf [file 1471-2164-13-373-S7.pdf]
